# Supplementary material
Source: MDPI journal article supplement (https://www.mdpi.com/2073-445X/7/3/108)
Supplement: s1 [file s1]

## **Supplementary Materials S1. Expert group-consensus workshop**

An expert workshop was conducted involving eight local experts (two team coordinators/ecologists, three ecologists, two social scientists, and one policy analyst) to analyze which land cover changes occurred in the West Kutai and Mahakam Ulu districts between 2000 and 2009.

We used semi-structured questions and a group-consensus approach instead of individual knowledge-elicitation, as this is an open procedure, allowing new ideas to arise (see Perera et al. 2011). The experts were asked open and closed questions about the main land uses and the main land cover change processes that occurred in the study area between 2000 and 2009. At the start of the workshop, all workshop participants agreed that it was impossible to discuss the land cover change processes in the period 1990 and 2000, since this was perceived as too long ago: in that period, the experts did not work in this field of expertise or in the region, or could not remember which specific land cover changes occurred. The experts did indicate that during the periods 1990–2000 and 2000–2009, land cover changed from more small-scale activities and agriculture (such as mixed cropland and smallholder rubber plantations in 1990–2000) to more large-scale activities (such as rubber plantations and oil palm plantations in 2000–2009). Before the interview, the definitions of land cover types and land cover change processes (as defined in Supplementary Materials S2) were explained.

### **The main open questions and answers:**

Q1. Did the existing land cover types and the type of land cover change processes in the landscape change between the periods 1990–2000 and 2000–2009?

A1. Yes, between 1990–2000 and 2000–2009, land cover change became much more dynamic in the region with land cover types rapidly succeeding each other. In the period 1990–2000, there were mostly small-scale land cover types, such as smallholder rubber gardens and mixed croplands (consisting of shifting cultivation systems and/or dryland fields). In 2000–2009, smallholders increasingly converted their rubber gardens to monoculture rubber plantations (i.e., intensification) and to oil palm plantations. Also, more commercial oil palm plantations were being developed. In 2000–2009 there was more intensification of agricultural lands.

Q2. What were the main land cover types and processes existing in the landscape between 2000 and 2009?

A2. Mixed croplands, smallholder rubber gardens and oil palm plantations were the main land cover types visible in the landscape. Large-scale deforestation and conversion by concession holders, and small-scale conversion of forest lands, shrublands or grasslands to mixed cropland and/or smallholder rubber were the main land cover change processes identified. On a much smaller scale, regeneration also occurred from grassland to shrubland and different forest types.

Q3. What were the main initial subsequent land cover types for the conversion of forest land, shrubland or

grassland (meaning: to what land cover type did farmers change the 'natural' land cover type, being grassland or shrubland or after forest clearing)?

A3. The main subsequent land cover types were mixed croplands, oil palm plantations and (less frequently) also rubber gardens.

Q4. Did the first subsequent land cover type after conversion in a certain area remain permanent after its establishment, or was it, in certain cases, changed into other land cover types?

A4. The initial land cover type was not necessarily permanent: mixed cropland was increasingly being converted to smallholder rubber gardens and also further to intensified rubber or oil palm plantations.

Q5. If so, which subsequent land cover types occurred after conversion to the first land cover type?

A5. The subsequent land cover types were smallholder rubber gardens, intensified rubber plantations and oil palm plantations.

Q6. According to the previous questions and answers, one can conclude that land cover trajectories existed in the landscape during the given time frame. Which were these? (land cover change trajectories: a sequence of land cover changes within a certain time frame)

A6. Yes, multiple land cover change trajectories existed, consisting of the following steps:

A. One-step trajectories of forest degradation and/or deforestation to grasslands or shrublands.

B. Multiple-step trajectories of (i) deforestation to grasslands, and (ii) conversion from grasslands to large-scale plantations.

C. Multiple-step trajectories of (i) forest degradation and/or deforestation and conversion to small-scale mixed cropland, (ii) conversion after 1-2 years to smallholder rubber, and (iii) in certain cases, further to monocultures, mostly oil palm. The time period to conversion of smallholder rubber to oil palm varied locally.

When small-scale rubber fields were converted into oil palm plantations, some smallholders established new mixed cropland areas in newly obtained forested lands, and land cover change trajectory C was initiated again in another area.

Q7. Could you identify so-called permanent land cover types (meaning land cover types that were not converted into other land cover types in the landscape during the given time frame)?

A7. Yes: oil palm plantations, pulpwood plantations and (coal) mining were perceived as permanent land uses between 2000 and 2009.

Q8. What is the reason/motivation for farmers to choose certain land cover types and to subsequently convert to other land cover types?

A8. Smallholders converted from mixed cropland or smallholder rubber gardens to monoculture plantations to increase their income. The choice of the smallholders between maintaining their mixed croplands or small-scale rubber garden into oil palm plantations (trajectory C in Figure S4) depended on the price competitiveness of their produce, including rubber, versus palm oil and on the presence of success stories in the village regarding oil palm cultivation.

During the workshop, the land cover types and the land cover changes from one land cover type to another were drawn on a white board in an interactive and iterative way, meaning that land cover types and the arrows in between were drawn and adapted according to the perceptions of the workshop participants. This interactive group-consensus discussion resulted in a basic drawing of the main land cover change trajectories on which the participants agreed by consensus.

## Supplementary Materials S2. Land cover change processes and trajectories

*Land cover* incorporates all biophysical attributes of the earth's surface. *Land use* indicates the human-induced utilisation of this land cover (Lambin *et al.*, 2001). For example, forest is a certain land cover type, however, the utilisation of forests can be different; for example, forest is a land cover type that can be used as a conservation or production forest. In this paper, land cover change is the process of change or changes of one land cover type to another. In Figure S 1, a conceptual framework of land cover change processes is shown, in which the left box shows the naturally-occurring land cover types, such as grasslands, shrublands and forest types. Forest types are classified according to canopy cover; closed canopy forest (>70% canopy cover), medium open canopy forest (40–70% canopy cover) and open forest (10–40% canopy cover) (Budiman *et al.*, 2014). The right box shows the land use types which are human-induced, e.g., agricultural lands, plantations, settlements and mining sites. The arrows show the land cover change processes that occur if one land cover type changes into another.

In this study, we define *land cover degradation* as the process of decreasing canopy cover within the forest category, for example from closed to medium canopy forest, or a decreasing biomass density within non-forest types, such as from shrublands to grasslands. Figure S 1 shows that forest can degrade into another forest type and can be subject to deforestation to shrubland or grassland. We define *deforestation* as a decrease in tree canopy cover to below a 10% threshold (Food and Agriculture Organization of the United Nations, 2014) or, more clearly, a change from forest to either shrubland or grassland. Regrowth or *regeneration* of degraded or deforested vegetation cover can occur, for instance, from grassland to shrubland or forest type. Land cover *conversion* is defined in this study as the change from any land cover type to a land cover type that is used for the production of commodities or extraction of natural resources, as shown in Figure S 1. Such land uses can subsequently be *abandoned and regenerated* into natural land cover types. All non-forest types, including shrublands and agricultural lands can be cleared through the process named *land clearance*.

Land cover change trajectories are different from land cover change processes in that these indicate the 'exact' sequence of land cover changes in a certain area over a specific period of time (Mertens & Lambin, 2000; Petit *et al.*, 2001), and consequently provide information about the changes from one land cover type to another. Trajectories can involve one or more steps or transitions; can be part of land cover change processes; or can be a combination of different land cover change processes (Figure S 1). For example, a trajectory can include the land cover change processes 'forest degradation' and 'conversion' in one sequence within a specific time period.

Additionally, forest degradation can follow the land cover change trajectory of a closed canopy forest to a medium open canopy forest, and further to an open canopy forest type.

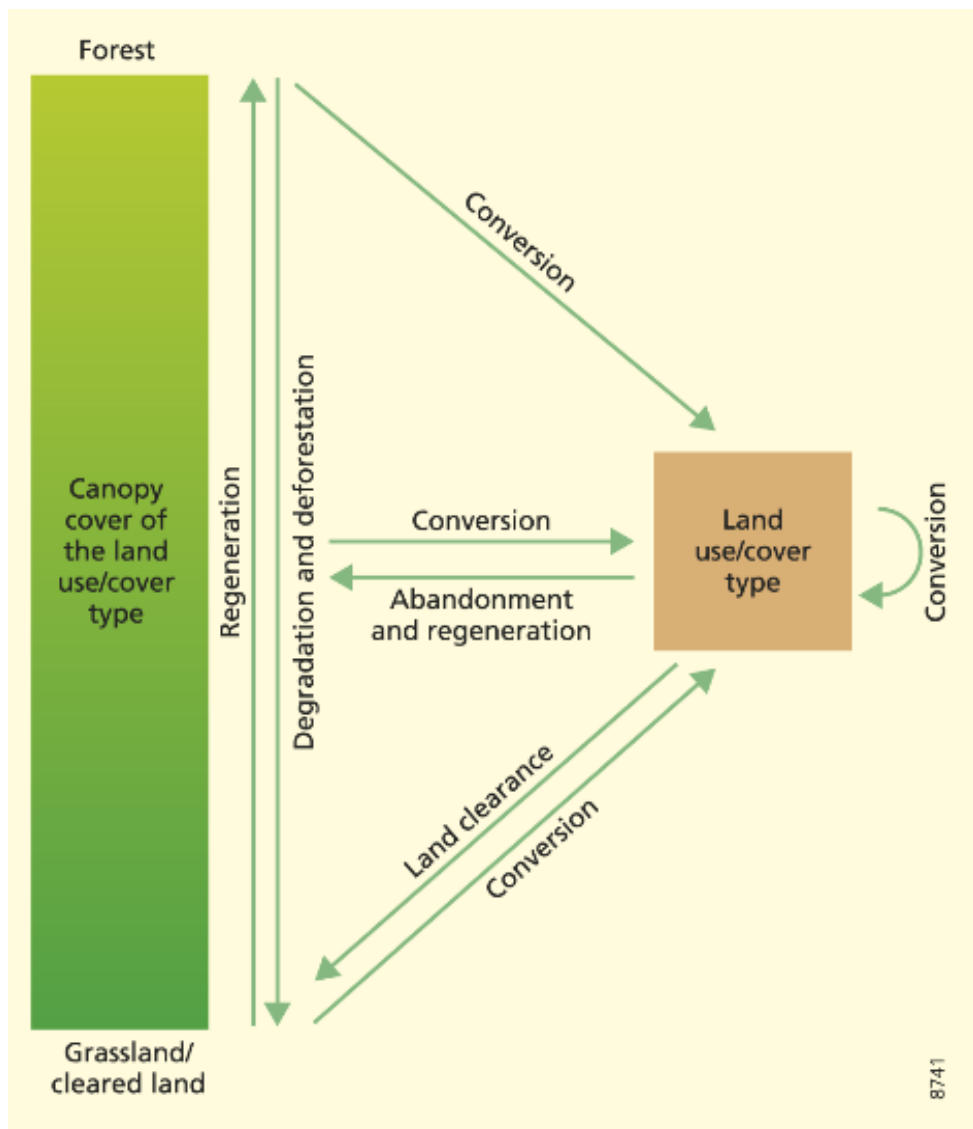

**Figure S1.** Conceptual model of the land cover changes and land cover change processes in a disturbed tropical forest landscape. (Processes are indicated by a single arrow; trajectories can involve one or multiple arrows)

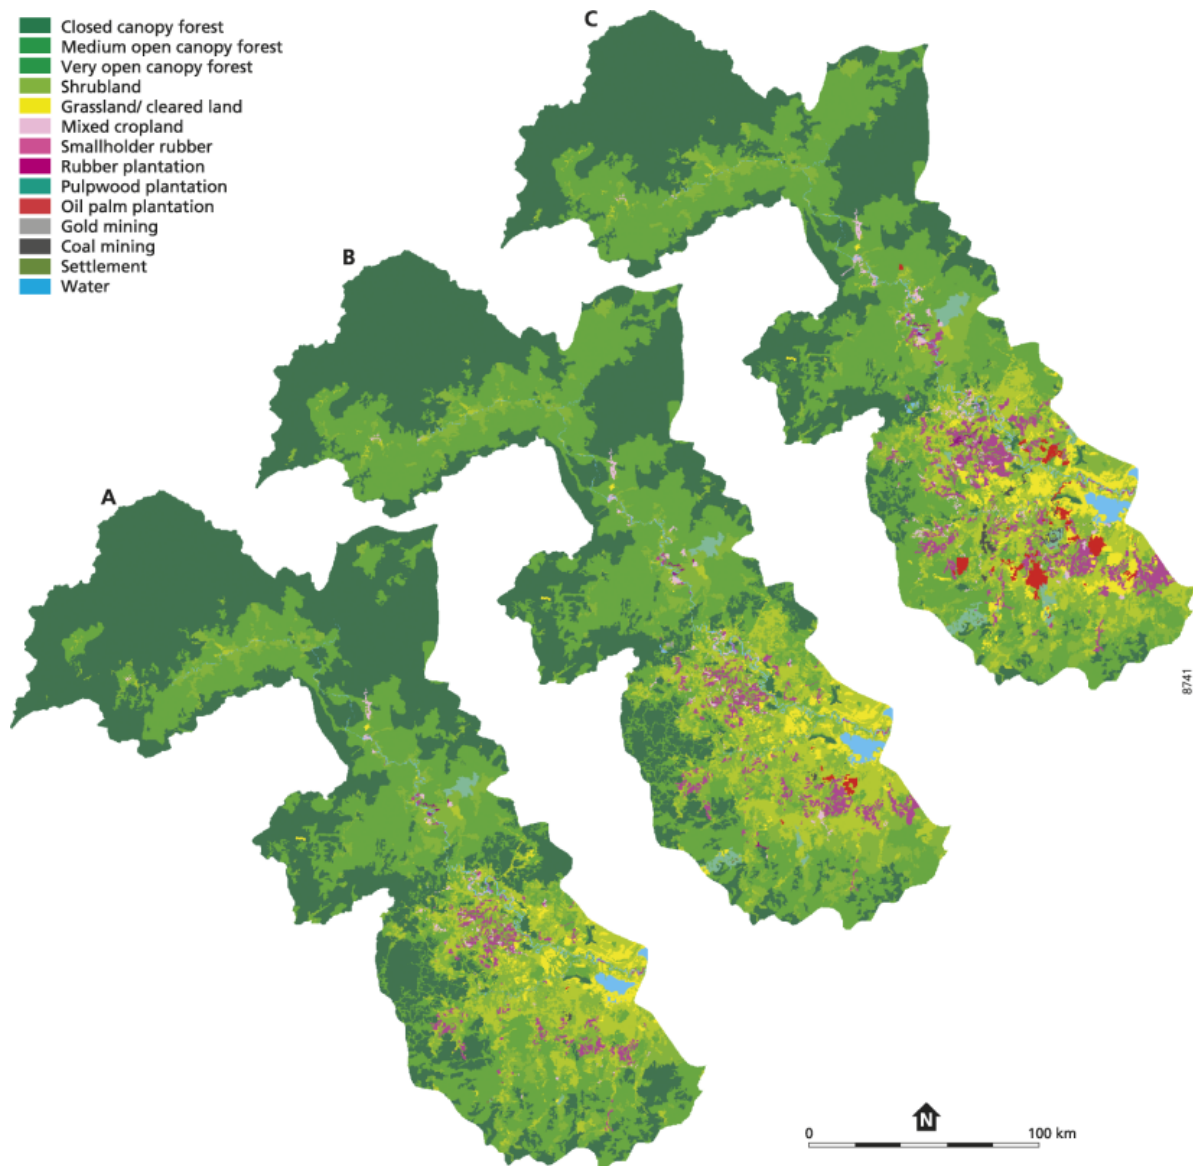

**Figure S2.** Land cover maps of the West Kutai and Mahakam Ulu Districts for 1990 (A), 2000 (B) and 2009 (C) (following Budiman et al. 2014) (1 raster cell is 100 x 100 m).

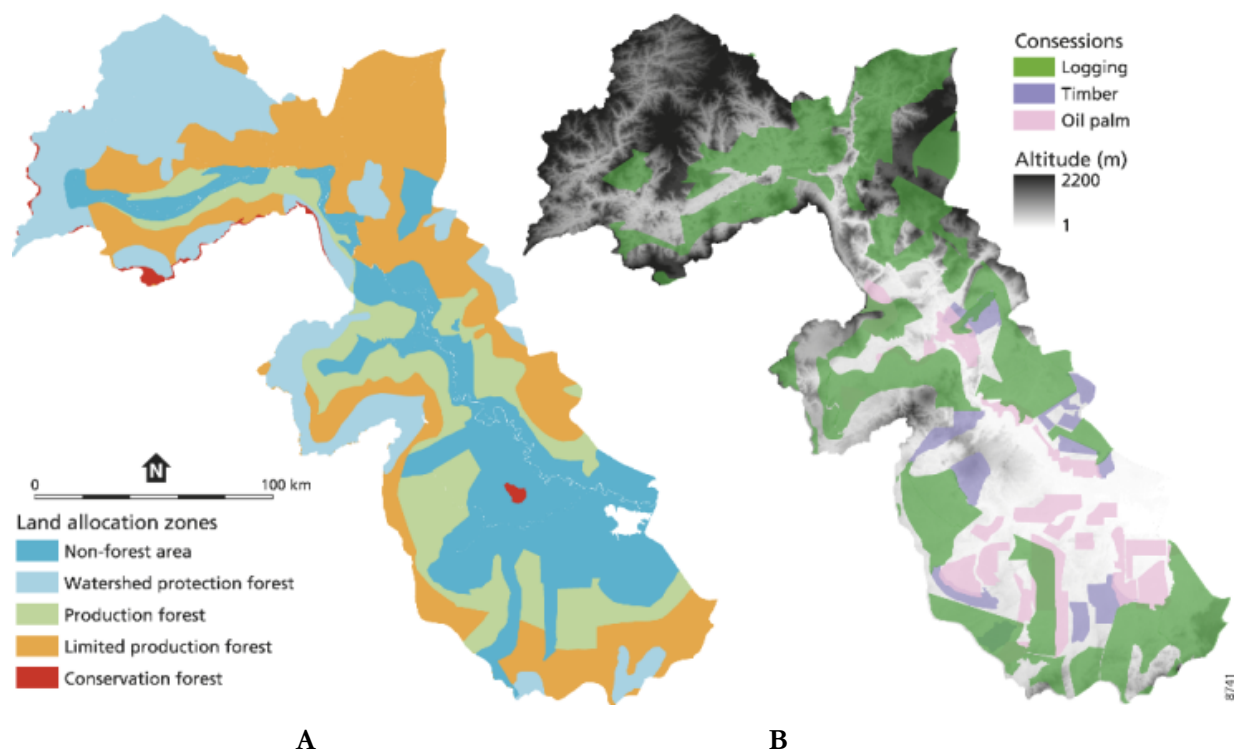

**Figure S3.** A) Land allocation zones; B) altitude (m) overlaid with concession maps for the West Kutai and Mahakam Ulu Districts (source: World Resources Institute 2014).

**Table S1.** Specification of the selected land cover types (following Budiman et al. 2014).

| Land cover type                                    | Subclasses in land cover types                | Soil type         | Canopy - Crown cover   |
|----------------------------------------------------|-----------------------------------------------|-------------------|------------------------|
| 1. Closed canopy forest (>70% canopy cover)        | Dry Lowland Forest rather closed canopy       | Dry               | Closed - >70%          |
|                                                    | Forest on Sandstone rock rather closed canopy | Sandstone rock    | Closed - >70%          |
|                                                    | Fresh Water Swamp Forest rather closed canopy | Fresh water swamp | Closed - >70%          |
|                                                    | Peat Swamp Forest rather closed canopy        | Peat swamp        | Closed - >70%          |
| 2. Medium open canopy forest (40–70% canopy cover) | Dry Lowland Forest medium open canopy         | Dry               | Medium open - 40–70%   |
|                                                    | Forest on Sandstone rock medium open canopy   | Sandstone rock    | Medium open - 40–70%   |
|                                                    | Fresh Water Swamp Forest medium open canopy   | Fresh water swamp | Medium open - 40–70%   |
|                                                    | Peat Swamp Forest medium open canopy          | Peat swamp        | Medium open - 40–70%   |
| 3. Open canopy forest (10–40% canopy cover)        | Dry Lowland Forest very open canopy           | Dry               | Very open - 10–40%     |
|                                                    | Forest on Sandstone rock very open canopy     | Sandstone rock    | Very open - 10–40%     |
|                                                    | Fresh Water Swamp Forest very open canopy     | Fresh water swamp | Very open - 10–40%     |
|                                                    | Peat Swamp Forest very open canopy            | Peat swamp        | Very open - 10–40%     |
|                                                    | Forest Re-growth (Belukar)                    |                   | Re-growth (Belukar)    |
|                                                    | Forest Re-growth on Swampy                    | Swampy            | Re-growth              |
| 4. Shrubland                                       | Shrubland (Semak/Belukar Muda)                |                   | Semak/Belukar Muda     |
|                                                    | Shrubland on Sandstone Forest                 | Sandstone rock    |                        |
|                                                    | Shrubland on Swampy                           | Swampy            |                        |
|                                                    | Overgrowing Clear cut-Shrubland               |                   | clear cut, overgrowing |
| 5. Grassland/cleared land                          | Swamp Grasses/Fernland                        | Swampy            |                        |
|                                                    | Grassland                                     |                   |                        |
|                                                    | Burnt                                         |                   |                        |
|                                                    | Cleared                                       |                   |                        |
|                                                    | Cleared for Industrial Pulpwood plantation    |                   |                        |
|                                                    | Cleared for Oil palm Plantation               |                   |                        |
| 6. Mixed cropland                                  | Mixed Cropland                                |                   |                        |
|                                                    | Mixed Garden                                  |                   |                        |
| 7. Smallholder Rubber                              | Small Holder Rubber                           |                   |                        |
| 8. Rubber plantation                               | Rubber Plantation                             |                   |                        |
| 9. Pulpwood plantation                             | Acacia Plantation                             |                   |                        |
|                                                    | <i>Paraserianthes falcataria</i>              |                   |                        |
|                                                    | Industrial Pulpwood plantation                |                   |                        |
| 10. Oil palm plantation                            | Oil palm Plantation                           |                   |                        |
|                                                    | Young Oil palm Plantation                     |                   |                        |
|                                                    | Young Oil Palm Plantation                     |                   |                        |
| 11. Gold mining                                    | Gold Mining                                   |                   |                        |
| 12. Coal mining                                    | Coal Mining                                   |                   |                        |
| 13. Settlement                                     | Settlement                                    |                   |                        |
| 14. Water                                          | Water Body                                    |                   |                        |



**Table S2.** Absolute land area (ha) per land cover type and relative land cover changes (%) between 1990, 2000 and 2009.

|                                 | 1990 (ha)        | 2000 (ha)        | 2009 (ha)        | % of total land in 1990 | % of total land in 2000 | % of total land in 2009 | Net loss or gain (%) between 1990 and 2000 | Net loss or gain (%) between 2000 and 2009 | Net loss or gain (%) between 1990 and 2009 |
|---------------------------------|------------------|------------------|------------------|-------------------------|-------------------------|-------------------------|--------------------------------------------|--------------------------------------------|--------------------------------------------|
| <b>Natural land cover types</b> |                  |                  |                  |                         |                         |                         | %                                          | %                                          | %                                          |
| <b>Total forested land</b>      | <b>2,902,255</b> | <b>2,797,588</b> | <b>2,651,877</b> | <b>88</b>               | <b>85</b>               | <b>81</b>               | <b>-4</b>                                  | <b>-5</b>                                  | <b>-9</b>                                  |
| 1. Closed canopy forest         | 1,579,037        | 1,264,373        | 1,114,442        | 48                      | 38                      | 34                      | -20                                        | -12                                        | -29                                        |
| 2. Medium open canopy forest    | 957,173          | 1,114,282        | 1,094,593        | 29                      | 34                      | 33                      | 16                                         | -2                                         | 14                                         |
| 3. Open canopy forest           | 366,045          | 418,933          | 442,842          | 11                      | 13                      | 13                      | 14                                         | 6                                          | 21                                         |
| 4. Shrubland                    | 248,882          | 309,529          | 278,631          | 8                       | 9                       | 8                       | 24                                         | -10                                        | 12                                         |
| 5. Grassland/cleared land       | 49,219           | 48,425           | 102,955          | 1                       | 1                       | 3                       | -2                                         | 113                                        | 109                                        |
| <b>Agriculture and mining</b>   |                  |                  |                  |                         |                         |                         |                                            |                                            |                                            |
| 6. Mixed cropland               | 11,640           | 15,590           | 26,151           | 0                       | 0                       | 1                       | 34                                         | 68                                         | 125                                        |
| 7. Smallholder Rubber           | 44,009           | 66,086           | 122,489          | 1                       | 2                       | 4                       | 50                                         | 85                                         | 178                                        |
| 8. Rubber plantation            | 954              | 1,365            | 2,970            | 0                       | 0                       | 0                       | 43                                         | 118                                        | 211                                        |
| 9. Pulpwood plantation          | 8,060            | 16,376           | 31,698           | 0                       | 0                       | 1                       | 103                                        | 94                                         | 293                                        |
| 10. Oil palm plantation         | 135              | 4,238            | 31,160           | 0                       | 0                       | 1                       | 3,039                                      | 635                                        | 22,981                                     |
| 11. Gold mining                 | 53               | 644              | 133              | 0                       | 0                       | 0                       | 1,115                                      | -79                                        | 151                                        |
| 12. Coal mining                 | 566              | 842              | 7,752            | 0                       | 0                       | 0                       | 49                                         | 821                                        | 1,270                                      |
| 13. Settlement                  | 3,077            | 3,162            | 6,741            | 0                       | 0                       | 0                       | 3                                          | 113                                        | 119                                        |
| 14. Water                       | 24,768           | 29,773           | 31,061           | 1                       | 1                       | 1                       | 20                                         | 4                                          | 25                                         |
| <b>Total</b>                    | <b>3,293,618</b> | <b>3,293,618</b> | <b>3,293,618</b> |                         |                         |                         |                                            |                                            |                                            |

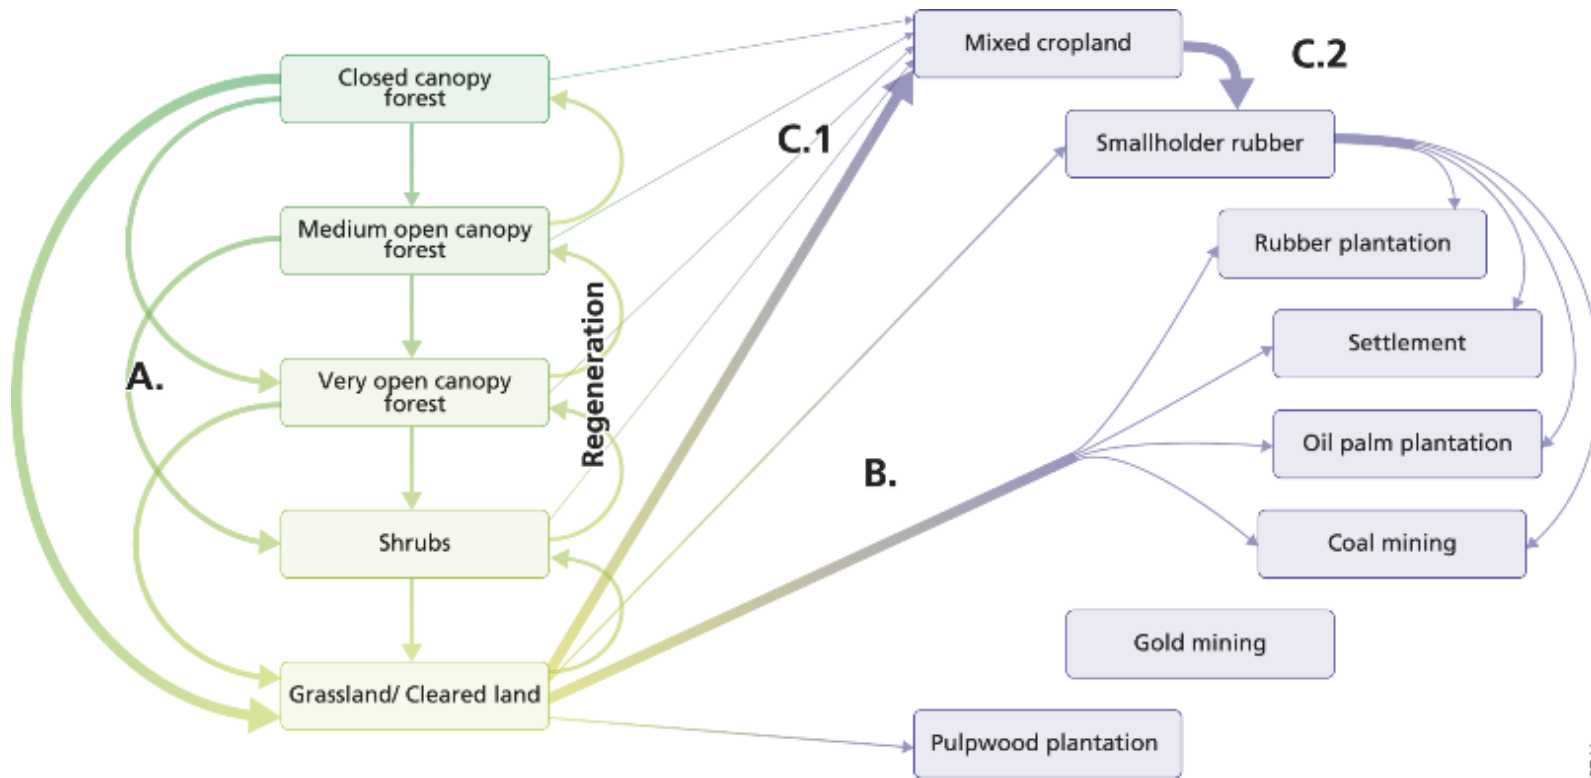

**Figure S4.** The main land cover change processes and trajectories identified for West Kutai and Mahakam Ulu based on expert knowledge. The trajectories are either dominant (thick arrows) or less dominant (thin arrows): A) degradation and/or deforestation to grasslands or shrublands; B) deforestation to grasslands, and conversion from grasslands to large-scale plantations; C1) degradation and/or deforestation to grasslands, conversion from grasslands to mixed cropland (which the experts referred to as shifting cultivation areas and/or dryland rice fields), after a few years, conversion from mixed cropland to smallholder rubber, and in certain cases; C2) further conversion from smallholder rubber to permanent land cover types, such as oil palm.

**Table S3.** Land cover change matrix (in ha) 1990–2000 for the West Kutai and Mahakam Ulu districts. These matrices indicate the number of pixels (and thus the hectares) change from one land cover type (vertical axis) to another (horizontal axis) within the selected time period.

|                     | Closed forest | Medium open forest | Very open forest | Shrubs  | Grassland/Cleared | Mixed cropland | Smallholder Rubber | Rubber plantation | Pulpwood plantation | Oil palm plantation | Gold mining | Coal mining | Settlement | Water  | Total 1990 |
|---------------------|---------------|--------------------|------------------|---------|-------------------|----------------|--------------------|-------------------|---------------------|---------------------|-------------|-------------|------------|--------|------------|
| Closed forest       | 1,261,735     | 275,564            | 29,218           | 9,850   | 280               | 853            | 900                |                   |                     |                     | 338         |             |            | 299    | 1,579,037  |
| Medium open forest  | 2,638         | 833,974            | 59,830           | 45,882  | 3,165             | 1,629          | 1,267              | 411               | 8,117               |                     | 154         |             |            | 106    | 957,173    |
| Very open forest    |               | 4,744              | 311,257          | 31,166  | 1,565             | 2,591          | 14,535             |                   | 52                  | 36                  | 99          |             |            |        | 366,045    |
| Shrubs              |               |                    | 18,582           | 218,749 | 1,596             | 716            | 4,811              |                   |                     | 4,067               |             | 276         | 85         |        | 248,882    |
| Grassland/Cleared   |               |                    | 25               | 2,428   | 41,809            |                | 210                |                   | 147                 |                     |             |             |            | 4,600  | 49,219     |
| Mixed cropland      |               |                    | 21               | 1,454   | 10                | 9,801          | 354                |                   |                     |                     |             |             |            |        | 11,640     |
| Smallholder Rubber  |               |                    |                  |         |                   |                | 44,009             |                   |                     |                     |             |             |            |        | 44,009     |
| Rubber plantation   |               |                    |                  |         |                   |                |                    | 954               |                     |                     |             |             |            |        | 954        |
| Pulpwood plantation |               |                    |                  |         |                   |                |                    |                   | 8,060               |                     |             |             |            |        | 8,060      |
| Oil palm plantation |               |                    |                  |         |                   |                |                    |                   |                     | 135                 |             |             |            |        | 135        |
| Gold mining         |               |                    |                  |         |                   |                |                    |                   |                     |                     | 53          |             |            |        | 53         |
| Coal mining         |               |                    |                  |         |                   |                |                    |                   |                     |                     |             | 566         |            |        | 566        |
| Settlement          |               |                    |                  |         |                   |                |                    |                   |                     |                     |             |             | 3,077      |        | 3,077      |
| Water               |               |                    |                  |         |                   |                |                    |                   |                     |                     |             |             |            | 24,768 | 24,768     |
| Total 2000          | 1,264,373     | 1,114,282          | 418,933          | 309,529 | 48,425            | 15,590         | 66,086             | 1,365             | 16,376              | 4,238               | 644         | 842         | 3,162      | 29,773 | 3,293,618  |

**Table S4.** Land cover change matrix (in %) 1990–2000 for the West Kutai and Mahakam Ulu districts. These matrices indicate the percentage of pixels change from one land cover type (vertical axis) to another (horizontal axis) within the selected time period.

|                     | Closed forest | Medium open forest | Very open forest | Shrubs | Grassland / Cleared | Mixed cropland | Smallholder Rubber | Rubber plantation | Pulpwood plantation | Oil palm plantation | Gold mining | Coal mining | Settlement | Water | Total 1990 |
|---------------------|---------------|--------------------|------------------|--------|---------------------|----------------|--------------------|-------------------|---------------------|---------------------|-------------|-------------|------------|-------|------------|
| Closed forest       | 38.31         | 8.37               | 0.89             | 0.30   | 0.01                | 0.03           | 0.03               |                   |                     |                     | 0.01        |             |            | 0.01  | 47.94      |
| Medium open forest  | 0.08          | 25.32              | 1.82             | 1.39   | 0.10                | 0.05           | 0.04               | 0.01              | 0.25                |                     | 0.00        |             |            | 0.00  | 29.06      |
| Very open forest    |               | 0.14               | 9.45             | 0.95   | 0.05                | 0.08           | 0.44               |                   | 0.00                | 0.00                | 0.00        |             |            |       | 11.11      |
| Shrubs              |               |                    | 0.56             | 6.64   | 0.05                | 0.02           | 0.15               |                   | -                   | 0.12                |             | 0.01        | 0.00       |       | 7.56       |
| Grassland / Cleared |               |                    | 0.00             | 0.07   | 1.27                | -              | 0.01               |                   | 0.00                |                     |             |             |            | 0.14  | 1.49       |
| Mixed cropland      |               |                    | 0.00             | 0.04   | 0.00                | 0.30           | 0.01               |                   |                     |                     |             |             |            |       | 0.35       |
| Smallholder Rubber  |               |                    |                  |        |                     |                | 1.34               |                   |                     |                     |             |             |            |       | 1.34       |
| Rubber plantation   |               |                    |                  |        |                     |                |                    | 0.03              |                     |                     |             |             |            |       | 0.03       |
| Pulpwood plantation |               |                    |                  |        |                     |                |                    |                   | 0.24                |                     |             |             |            |       | 0.24       |
| Oil palm plantation |               |                    |                  |        |                     |                |                    |                   |                     | 0.00                |             |             |            |       | 0.00       |
| Gold mining         |               |                    |                  |        |                     |                |                    |                   |                     |                     | 0.00        |             |            |       | 0.00       |
| Coal mining         |               |                    |                  |        |                     |                |                    |                   |                     |                     |             | 0.02        |            |       | 0.02       |
| Settlement          |               |                    |                  |        |                     |                |                    |                   |                     |                     |             |             | 0.09       |       | 0.09       |
| Water               |               |                    |                  |        |                     |                |                    |                   |                     |                     |             |             |            | 0.75  | 0.75       |
| Total 2000          | 38.39         | 33.83              | 12.72            | 9.40   | 1.47                | 0.47           | 2.01               | 0.04              | 0.50                | 0.13                | 0.02        | 0.03        | 0.10       | 0.90  | 100.00     |

**Table S5.** Land cover change matrix (in ha) 2000–2009 for the West Kutai and Mahakam Ulu districts. These matrices indicate the number of pixels (and thus the hectares) change from one land cover type (vertical axis) to another (horizontal axis) within the selected time period.

|                     | Closed forest | Medium open forest | Very open forest | Shrubs  | Grassland/Cleared | Mixed cropland | Smallholder Rubber | Rubber plantation | Pulpwood plantation | Oil palm plantation | Gold mining | Coal mining | Settlement | Water  | Total 2000 |
|---------------------|---------------|--------------------|------------------|---------|-------------------|----------------|--------------------|-------------------|---------------------|---------------------|-------------|-------------|------------|--------|------------|
| Closed forest       | 1,102,673     | 142,241            | 8,954            | 4,119   | 1,650             | 1,413          | 701                |                   |                     | 2,435               |             | 182         |            | 5      | 1,264,373  |
| Medium open forest  | 10,790        | 948,713            | 108,182          | 26,722  | 5,253             | 4,373          | 6,967              |                   | 1,288               | 1,663               |             | 285         | 13         | 33     | 1,114,282  |
| Very open forest    | 979           | 3,052              | 286,742          | 63,180  | 13,222            | 4,282          | 36,261             |                   | 3,992               | 2,966               |             | 3,106       | 1,139      | 12     | 418,933    |
| Shrubs              |               | 438                | 36,779           | 176,113 | 45,781            | 5,581          | 13,644             | 746               | 7,609               | 17,623              |             | 3,447       | 1,040      | 728    | 309,529    |
| Grassland/Cleared   |               |                    | 1,913            | 6,287   | 36,548            | 233            | 76                 |                   | 1,446               | 1,428               |             | 93          | 160        | 241    | 48,425     |
| Mixed cropland      |               | 149                | 239              | 2,202   | 336               | 9,902          | 1,817              |                   | 158                 | 33                  |             | 39          | 715        |        | 15,590     |
| Smallholder Rubber  |               |                    |                  |         | 48                | 367            | 62,496             | 1,307             | 282                 | 834                 |             | 192         | 560        |        | 66,086     |
| Rubber plantation   |               |                    |                  |         |                   |                | 448                | 917               |                     |                     |             |             |            |        | 1,365      |
| Pulpwood plantation |               |                    |                  |         |                   |                |                    |                   | 16,376              |                     |             |             |            |        | 16,376     |
| Oil palm plantation |               |                    |                  |         | 60                |                |                    |                   |                     | 4,178               |             |             |            |        | 4,238      |
| Gold mining         |               |                    |                  |         |                   |                |                    |                   | 157                 |                     | 133         |             |            | 354    | 644        |
| Coal mining         |               |                    |                  | 3       |                   |                |                    |                   | 390                 |                     |             | 408         | 41         |        | 842        |
| Settlement          |               |                    | 24               |         |                   |                | 79                 |                   |                     |                     |             |             | 3,059      |        | 3,162      |
| Water               |               |                    | 9                | 5       | 57                |                |                    |                   |                     |                     |             |             | 14         | 29,688 | 29,773     |
| Total 2009          | 1,114,442     | 1,094,593          | 442,842          | 278,631 | 102,955           | 26,151         | 122,489            | 2,970             | 31,698              | 31,160              | 133         | 7,752       | 6,741      | 31,061 | 3,293,618  |

**Table S6.** Land cover change matrix (in %) 2000–2009 for the West Kutai and Mahakam Ulu districts. These matrices indicate the number of pixels change from one land cover type (vertical axis) to another (horizontal axis) within the selected time period.

|                     | Closed forest | Medium open forest | Very open forest | Shrubs | Grassland/Cleared | Mixed cropland | Smallholder Rubber | Rubber plantation | Pulpwood plantation | Oil palm plantation | Gold mining | Coal mining | Settlement | Water | Total 2000 |
|---------------------|---------------|--------------------|------------------|--------|-------------------|----------------|--------------------|-------------------|---------------------|---------------------|-------------|-------------|------------|-------|------------|
| Closed forest       | 33.48         | 4.32               | 0.27             | 0.13   | 0.05              | 0.04           | 0.02               |                   |                     | 0.07                |             | 0.01        |            | 0.00  | 38.39      |
| Medium open forest  | 0.33          | 28.80              | 3.28             | 0.81   | 0.16              | 0.13           | 0.21               |                   | 0.04                | 0.05                |             | 0.01        | 0.00       | 0.00  | 33.83      |
| Very open forest    | 0.03          | 0.09               | 8.71             | 1.92   | 0.40              | 0.13           | 1.10               |                   | 0.12                | 0.09                |             | 0.09        | 0.03       | 0.00  | 12.72      |
| Shrubs              |               | 0.01               | 1.12             | 5.35   | 1.39              | 0.17           | 0.41               | 0.02              | 0.23                | 0.54                |             | 0.10        | 0.03       | 0.02  | 9.40       |
| Grassland/Cleared   |               |                    | 0.06             | 0.19   | 1.11              | 0.01           | 0.00               |                   | 0.04                | 0.04                |             | 0.00        | 0.00       | 0.01  | 1.47       |
| Mixed cropland      |               | 0.00               | 0.01             | 0.07   | 0.01              | 0.30           | 0.06               |                   | 0.00                | 0.00                |             | 0.00        | 0.02       |       | 0.47       |
| Smallholder Rubber  |               |                    |                  |        | 0.00              | 0.01           | 1.90               | 0.04              | 0.01                | 0.03                |             | 0.01        | 0.02       |       | 2.01       |
| Rubber plantation   |               |                    |                  |        |                   |                | 0.01               | 0.03              |                     |                     |             |             |            |       | 0.04       |
| Pulpwood plantation |               |                    |                  |        |                   |                |                    |                   | 0.50                |                     |             |             |            |       | 0.50       |
| Oil palm plantation |               |                    |                  |        | 0.00              |                |                    |                   |                     | 0.13                |             |             |            |       | 0.13       |
| Gold mining         |               |                    |                  |        |                   |                |                    |                   | 0.00                |                     | 0.00        |             |            | 0.01  | 0.02       |
| Coal mining         |               |                    |                  | 0.00   |                   |                |                    |                   | 0.01                |                     |             | 0.01        | 0.00       |       | 0.03       |
| Settlement          |               |                    | 0.00             |        |                   |                | 0.00               |                   |                     |                     |             |             | 0.09       |       | 0.10       |
| Water               |               |                    | 0.00             | 0.00   | 0.00              |                |                    |                   |                     |                     |             |             | 0.00       | 0.90  | 0.90       |
| Total 2009          | 33.84         | 33.23              | 13.45            | 8.46   | 3.13              | 0.79           | 3.72               | 0.09              | 0.96                | 0.95                | 0.00        | 0.24        | 0.20       | 0.94  | 100.00     |

**Table S7.** Land cover change processes defined, i.e., the conversions from land cover types in the left columns to land cover types in the top rows.

|                              | 1. Closed canopy forest      | 2. Medium open canopy forest | 3. Open canopy forest | 4. Shrubland  | 5. Grassland/ cleared land | 6. Mixed cropland               | 7. Smallholder Rubber | 8. Rubber plantation            | 9. Pulpwood plantation | 10. Oil palm plantation | 11. Gold mining | 12. Coal mining | 13. Settlement |  |  |
|------------------------------|------------------------------|------------------------------|-----------------------|---------------|----------------------------|---------------------------------|-----------------------|---------------------------------|------------------------|-------------------------|-----------------|-----------------|----------------|--|--|
| 1. Closed canopy forest      |                              | Degradation                  |                       | Deforestation |                            | Conversion to agricultural land |                       |                                 |                        |                         |                 |                 |                |  |  |
| 2. Medium open canopy forest |                              |                              |                       |               |                            |                                 |                       |                                 |                        |                         |                 |                 |                |  |  |
| 3. Open canopy forest        |                              |                              |                       |               |                            |                                 |                       |                                 |                        |                         |                 |                 |                |  |  |
| 4. Shrubland                 | Regeneration                 |                              |                       |               |                            |                                 |                       |                                 |                        |                         |                 |                 |                |  |  |
| 5. Grassland/ cleared land   |                              |                              |                       |               |                            |                                 |                       |                                 |                        |                         |                 |                 |                |  |  |
| 6. Mixed cropland            | Abandonment and regeneration |                              |                       |               |                            | Land clearance                  |                       | Conversion to agricultural land |                        |                         |                 |                 |                |  |  |
| 7. Smallholder Rubber        |                              |                              |                       |               |                            |                                 |                       |                                 |                        |                         |                 |                 |                |  |  |
| 8. Rubber plantation         |                              |                              |                       |               |                            |                                 |                       |                                 |                        |                         |                 |                 |                |  |  |
| 9. Pulpwood plantation       |                              |                              |                       |               |                            |                                 |                       |                                 |                        |                         |                 |                 |                |  |  |
| 10. Oil palm plantation      |                              |                              |                       |               |                            |                                 |                       |                                 |                        |                         |                 |                 |                |  |  |
| 11. Gold mining              |                              |                              |                       |               |                            |                                 |                       |                                 |                        |                         |                 |                 |                |  |  |
| 12. Coal mining              |                              |                              |                       |               |                            |                                 |                       |                                 |                        |                         |                 |                 |                |  |  |
| 13. Settlement               |                              |                              |                       |               |                            |                                 |                       |                                 |                        |                         |                 |                 |                |  |  |

**Table S8.** Overview of net area lost in 1990 and net area gained in 2009 per land cover type (in hectares)

|                                   | Total area lost<br>between 1990<br>and 2009 (ha) | Total area<br>gained between<br>1990 and 2009<br>(ha) | Net loss or gain<br>between 1990 and<br>2009 (ha) |
|-----------------------------------|--------------------------------------------------|-------------------------------------------------------|---------------------------------------------------|
|                                   |                                                  |                                                       |                                                   |
| <b><i>Total forested land</i></b> |                                                  |                                                       |                                                   |
| 1. Closed canopy forest           | 478,318                                          | 13,723                                                | -464,595                                          |
| 2. Medium open canopy forest      | 260,522                                          | 397,942                                               | 137,420                                           |
| 3. Open canopy forest             | 140,279                                          | 217,076                                               | 76,797                                            |
| 4. Shrubland                      | 118,833                                          | 148,582                                               | 29,749                                            |
| 5. Grassland/ cleared land        | 16,264                                           | 70,000                                                | 53,736                                            |
| <b><i>Land use types</i></b>      |                                                  |                                                       |                                                   |
| 6. Mixed cropland                 | 5,145                                            | 19,656                                                | 14,511                                            |
| 7. Smallholder Rubber             | 3,320                                            | 81,800                                                | 78,480                                            |
| 8. Rubber plantation              | 37                                               | 2,053                                                 | 2,016                                             |
| 9. Pulpwood plantation            | -                                                | 23,638                                                | 23,638                                            |
| 10. Oil palm plantation           | -                                                | 31,025                                                | 31,025                                            |
| 11. Gold mining                   | -                                                | 80                                                    | 80                                                |
| 12. Coal mining                   | 429                                              | 7,615                                                 | 7,186                                             |
| 13. Settlement                    | 103                                              | 3,767                                                 | 3,664                                             |
| 14. Water                         | 85                                               | 6,378                                                 | 6,293                                             |
| <b>Total ha changed</b>           |                                                  |                                                       | 1,023,335                                         |
| <b>Total ha no change</b>         |                                                  |                                                       | 2,270,283                                         |



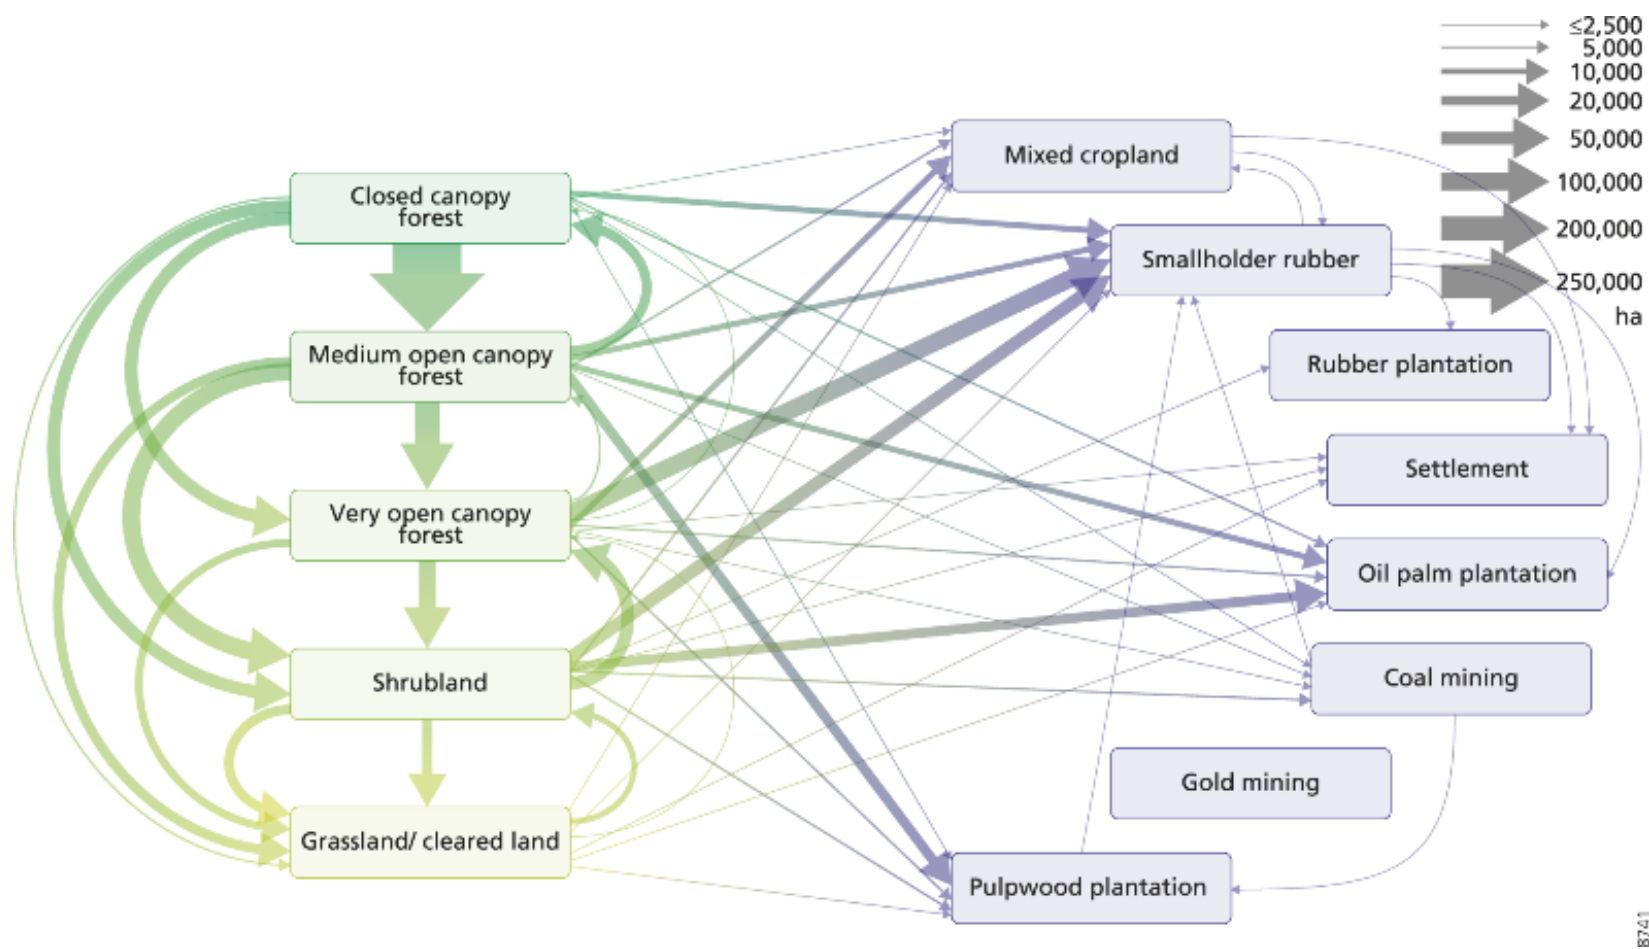

**Figure S5.** The land cover change trajectories (single arrows) as identified in the West Kutai and Mahakam Ulu districts between 1990 and 2009.

**Table S9.** Land area (hectares) of land cover types in concessions in 2009.

|                                   | Total land area in 2009 | Land area outside concessions* | Land area in concessions |                    |                     |                   |
|-----------------------------------|-------------------------|--------------------------------|--------------------------|--------------------|---------------------|-------------------|
|                                   |                         |                                | Total                    | Logging concession | Oil palm concession | Timber concession |
| <b>Total forested land</b>        | <b>2,651,900</b>        | <b>1,348,200</b>               | <b>1,303,700</b>         | <b>1,073,600</b>   | <b>144,700</b>      | <b>85,300</b>     |
| 1. Closed canopy forest           | 1,114,400               | 801,200                        | 313,200                  | 289,900            | 17,200              | 6,100             |
| 2. Medium open canopy forest      | 1,094,600               | 368,500                        | 726,100                  | 619,700            | 61,300              | 45,000            |
| 3. Open canopy forest             | 442,800                 | 178,400                        | 264,400                  | 164,000            | 66,200              | 34,200            |
| 4. Shrubland                      | 278,600                 | 94,300                         | 184,300                  | 84,500             | 63,900              | 35,900            |
| 5. Grassland/cleared land         | 103,000                 | 50,500                         | 52,500                   | 9,700              | 35,300              | 7,600             |
| <b>Land use types</b>             | <b>229,200</b>          | <b>91,200</b>                  | <b>138,000</b>           | <b>46,600</b>      | <b>54,200</b>       | <b>37,400</b>     |
| 6. Mixed cropland                 | 26,200                  | 13,200                         | 13,000                   | 4,900              | 5,000               | 3,100             |
| 7. Smallholder Rubber             | 122,500                 | 61,600                         | 60,900                   | 24,000             | 27,800              | 9,200             |
| 8. Rubber plantation              | 3,000                   | 2,000                          | 1,000                    | 100                | 600                 | 200               |
| 9. Pulpwood plantation            | 31,700                  | -6,300*                        | 38,000                   | 13,000             | 1,700               | 23,300            |
| 10. Oil palm plantation           | 31,200                  | 11,300                         | 19,900                   | 2,200              | 16,600              | 1,200             |
| 11. Gold mining                   | 100                     | 100                            |                          |                    |                     |                   |
| 12. Coal mining                   | 7,800                   | 4,500                          | 3,300                    | 1,800              | 1,500               | -                 |
| 13. Settlement                    | 6,700                   | 4,800                          | 1,900                    | 600                | 1,000               | 400               |
| 14. Water                         | 31,100                  | 28,300                         | 2,800                    | 200                | 2,600               | -                 |
| <b>Total land area</b>            | <b>3,300,000</b>        | <b>1,618,700</b>               | <b>1,681,300</b>         | <b>1,214,600</b>   | <b>300,700</b>      | <b>166,200</b>    |
| Total share of land in study area |                         | 49%                            | 51%                      | 37%                | 9%                  | 5%                |

\* The land area outside concessions was estimated by subtracting the total land area in 2009 with the land area in concessions.

\* There is a discrepancy between the total land area in 2009 and the land area in concessions, as there is overlap between the concession types.

**Table S10.** Occurrence (%) of land cover change processes in the period 2000–2009 in concession types.

| land cover change processes  | Land area outside concessions | Land area in concessions |                    |                     |                   |
|------------------------------|-------------------------------|--------------------------|--------------------|---------------------|-------------------|
|                              |                               | Total                    | Logging concession | Oil palm concession | Timber concession |
| Abandonment and regeneration | 49%                           | 51%                      | 6%                 | 14%                 | 31%               |
| Clearance                    | 35%                           | 65%                      | 8%                 | 45%                 | 11%               |
| Conversion                   | 44%                           | 56%                      | 18%                | 26%                 | 12%               |
| Deforestation                | 29%                           | 71%                      | 38%                | 20%                 | 12%               |
| Degradation                  | 29%                           | 71%                      | 51%                | 11%                 | 9%                |
| Regeneration                 | 60%                           | 40%                      | 24%                | 13%                 | 3%                |

**Table S11.** Occurrence of land cover types (in 2009) in land allocation zones (World Resources Institute, 2014) (in hectares, figures are rounded).

|                              | <b>Non-forest area</b> | <b>Conservation forest</b> | <b>Limited production forest</b> | <b>Production forest</b> | <b>Watershed protection forest</b> | <b>Other (boundary issue)</b> |
|------------------------------|------------------------|----------------------------|----------------------------------|--------------------------|------------------------------------|-------------------------------|
| 1. Closed canopy forest      | 60,100                 | 12,500                     | 344,100                          | 77,900                   | 616,400                            | 3,400                         |
| 2. Medium open canopy forest | 194,300                | 2,200                      | 518,400                          | 271,100                  | 106,200                            | 2,400                         |
| 3. Open canopy forest        | 204,500                | 900                        | 118,400                          | 104,200                  | 13,300                             | 1,500                         |
| 4. Shrubland                 | 148,200                | 1,700                      | 60,000                           | 66,100                   | 2,000                              | 600                           |
| 5. Grassland/cleared land    | 84,000                 | 2,400                      | 600                              | 5,800                    | 100                                | 10,100                        |
| 6. Mixed cropland            | 18,100                 | -                          | 2,400                            | 5,300                    | 100                                | 300                           |
| 7. Smallholder Rubber        | 89,700                 | 50                         | 6,100                            | 25,100                   | 900                                | 650                           |
| 8. Rubber plantation         | 2,600                  | -                          | -                                | 300                      | -                                  | 100                           |
| 9. Pulpwood plantation       | 5,100                  | -                          | 7,700                            | 18,700                   | -                                  | 200                           |
| 10. Oil palm plantation      | 25,500                 | -                          | -                                | 5,600                    | -                                  | 100                           |
| 11. Gold mining              | -                      | -                          | 100                              | -                        | -                                  | 0                             |
| 12. Coal mining              | 7,100                  | -                          | -                                | 700                      | -                                  | 0                             |
| 13. Settlement               | 5,800                  | -                          | 200                              | 400                      | 100                                | 200                           |
| 14. Water                    | 5,400                  | -                          | 600                              | 50                       | 50                                 | 25,000                        |
| Total                        | 850,400                | 19,750                     | 1,058,600                        | 581,250                  | 739,150                            | 50,850                        |

**Table S12.** Occurrence of timber, logging and oil palm concessions in land allocation zones (World Resources Institute, 2014) (in hectares).

|                                            | Logging concession (ha) | Oil palm concession (ha) | Timber concession (ha) |
|--------------------------------------------|-------------------------|--------------------------|------------------------|
| Overlapping pixels with other concessions* | 900                     | 2,300                    | 100                    |
| Non-forest area                            | 77,100                  | 224,900                  | 8,600                  |
| Conservation forest                        | 3,600                   | -                        | -                      |
| Limited production forest                  | 741,300                 | 8,800                    | 37,500                 |
| Production forest                          | 364,300                 | 63,900                   | 119,700                |
| Watershed protection forest                | 27,400                  | 500                      | 300                    |
| Total                                      | 1,214,600               | 300,400                  | 166,200                |

\*Concession areas are sometimes overlapping with one another.
